# Supplementary material
Source: HighWire-hosted journal article supplement (https://rmdopen.bmj.com/content/3/2/e000498)
Supplement: inline-supplementary-material-1 [file inline-supplementary-material-1.xlsx]

## Sheet: Suppl. Table 1
Supplementary Table 1. Baseline characteristics - definitions
	Definitions
Baseline characteristic	Fostamatinib trials	SRR	NOAR	CORRONA	CORRONA International	IORRA
Demographic characteristics at baseline
Sex	From clinical database	Physician report, using two options.	Patient reported and collected at each follow-up.	patient reported Gender is self-reported by the patient at enrollment.	Same as CORRONA	Patient reported and collected at each survey.
Age	From clinical database	Automatically derived from personal identification number	Patient reported at baseline. Depending on the date in question, the patient's age is caluclated based on their date of birth.	patient reported age Age is self-reported by the patient at enrollment (year of birth) and is updated at every visit moving forward in the registry. Age in years if age<90; Age ≥90 collapsed as one category	Same as CORRONA	Patient reported and collected at each survey.
Race	From clinical database	NA	Ethnicity is patient reported at baseline.	Race is self-reported by the patient at enrollment and they have the option to mark multiple boxes. Race is grouped into mutually exclusive groups with 'first' marked as the race indicator in order: 1) white 2) asian 3) black 4) all other	Same as CORRONA	No information about race is included in the IORRA questionnaire, but >99% of patients in IORRA are Japanese
Baseline co-morbidities
	From clinical database, only available if phase III studies.	Based on ICD-codes for hospitalizations as assigned by the treating physician and automatically reported to the national Patient Register - except cancer which is based on the Cancer Registry	Based on patient reporting (table and free text) and hospital episode statistics (HES). Hospital records go back to the start of 2000 while patient reported information goes back as far as the patient can remember.	Comorbidities are captured on the Physician form at each visit. At enrollment history of comorbidities (any present and year of onset) reported by MD and on each follow-up visit any new events since last CORRONA visit (last form) are reported. A history of a reported comorbidity is defined for each visit using reported history at enrollment and cumulative report of incident cases during follow up…	Same process as CORRONA - physician reported comorbidities. Ever diagnosed at enrollment and new since last visit on follow up forms	Based on the self-report by patientsat each survey. and based on the separate self-report questionnare sheet at first enrollment in the IORRA cohort in which patients mark the history of specific cormorbidities before enrollment in the cohort.
Diabetes	• Diabetes Mellitus = ‘Yes’ from the specific cardiovascular medical and surgical history module • Baseline use of any treatment in the ATC category of ‘DRUGS USED IN DIABETES’ (A10) • Documented fasting glucose ≥7 mmol/L (126 mg/dL) or a glucose value not confirmed as documented fasting ≥11.1 mmol/L (200 mg/dL) at baseline	Any hospitalization with ICD10 codes E10-E14,O24 (for earlier dates ICD9 250,648A, ICD8 250,761.1) as primary or secondary diagnosis from 1 Jan 1969 and before or on the index date	Any hospitalization with ICD10 codes E10-E14,O24 as primary or secondary diagnosis after 1 Jan 2000 and before or on the index date	Physician reported diabetes mellitus as described above. All versions	same as CORRONA	Patient reported and collected at each survey.
Coronary artery disease	"CORONARY ARTERY DISEASE" in medical history	Any hospitalization with ICD10 codes I20-I25 (for earlier dates ICD9 410-414, ICD8 410-414) as primary or secondary diagnosis from 1 Jan 1969 and before or on the index date	Any hospitalization with ICD10 codes I20-I25 as primary or secondary diagnosis after 1 Jan 2000 and before or on the index date	Based on Physician reported CAD ver 4-6 [10/2001-6/2008]and Physician reported specific comorbidities (version 7 and later[ 6/2008-12/2011]). We include the following (acute events that only occur if you have CAD and therefore any visit with these events should be defined as CAD moving forward in the registry): MI, Acute Cor. Syndrome, Unstable Angina. CAD indicator in versions 4-5-6; CAD defined…	CAD comorbidity indicator on enrollment and follow up.	Based on the self-report by patients at each survey.
Hypertension	Hypertension = Past or Current in 'Specific cardiovascular medical and sugical history'	Any hospitalization with ICD10 codes I10-I15 (for earlier dates ICD9 401-405, ICD8 400-404) as primary or secondary diagnosis from 1 Jan 1969 and before or on the index date	Any hospitalization with ICD10 codes I10-I15 as primary or secondary diagnosis after 1 Jan 2000and before or on the index date	Indicator of Hypertension in MD comorbidities as described above. Captured on all versions. 10/2001-12/2011	Physician reported history of Hypertension on enrollment; incident hypertension on follow up (separate indicator for hypertension requiring hospitalization)	Based on the self-report by patients at each survey.
Ulcer (peptic or bleeding)	NA (not consistently captured)	Any hospitalization with ICD10 codes K25-K27 (for earlier dates ICD9 531-533, ICD8 531-534) as primary or secondary diagnosis from 1 Jan 1969 and before or on the index date	Any hospitalization with ICD10 codes K25-K27 (for earlier dates ICD9 531-533, ICD8 531-534) as primary or secondary diagnosis after 1 Jan 2000 and before or on the index date	indicators on MD comoribidity list as described above. Versions 4-6 [10/2001-6/2008]] separate indicators peptic ulcer/bleeding ulcer; version 7 [6/2008-10/2010] single indicator: Ulcer(peptic/bleeding) version 8-10 [10/2010-12/2011 & subset of sites 4/2010-12/2011] peptic ulcer.	Md reported peptic ulcer.	Based on the self-report by patients at each survey.
Liver disease	NA (not consistently captured)	Any hospitalization with ICD10 codes K70-K74 (for earlier dates ICD9 570-573, ICD8 570-573) as primary or secondary diagnosis from 1 Jan 1969 and before or on the index date	Any hospitalization with ICD10 codes K70-K74 (for earlier dates ICD9 570-573, ICD8 570-573) as primary or secondary diagnosis after 1 Jan 2000 and before or on the index date	Liver disorder / alcohol abuse and hepatic events – refers to history of Liver disorder and alcohol abuse from physician comorbidity list (Liver disorder captured on version 7 and earlier, alcohol abuse captured on version 7 and earlier[ 10/2001-10/2010]); hepatic event indicators captured in version 8-10.[10/2010-12/2011 & subset of sites 4/2010-10/2010] Version 4-7 liver disorder; alcohol abuse…	Md reported comorbidities: Hepatitis B and C; non-viral hepatitis at enrollment and follow-up; hepatic event requiring hospitalization at follow up.	Based on the self-report by patients at each survey.
Cardiovascular prophylaxis (regular low-dose aspirin)	NA	NA	NA	includes indication of aspirin use from Patient form. Patient reported aspirin (baby or 325mg) all versions	MD reported medication use: aspirain/acetylsalicylic acid.	Based on the variable Lowdose Aspirin for patients included from Oct-03 survey, missing for subjects included before that
Treatment assigned at baseline (treatment used from baseline)
		Based on prescriptions made by treating physician at each visit.				Based on the self-report by patients and collected every survey.
Started/ongoing methotrexate	ATC code L01BA01	As entered by the treating physician.	Patient reported by interview with nurse at NOAR baseline and all follow-ups.	Physician reported MTX use at index date for cohort used.	Physician reported current use of MTX at index date.	Based on the self-report by patients at each survey, which has been collected since Oct-00.
Started/ongoing other non-biologic DMARD	ATC codes A07EC01, L04AA06, L04AA13, L04AD01, L04AX01, M01CB, M01CC01, P01BA01, P01BA02	As entered by the treating physician.	Patient reported by interview with nurse at NOAR baseline and all follow-ups.	Physician reported use of any nonbiologic DMARD at index date for cohort used.	Physician reported current use of non-biologic DMARD at indexdate.	Based on the self-report by patients at each survey. Information has been collected since when: Azathioprine Oct-00 Sulfasalazine Oct-00 Gold GST Oct-00 Tiopronin Oct-00 Penicillamine Oct-00 Mizoribine Oct-00 Lobenzarit disodium Oct-00 Auranofin Oct-00 Bucillamine Oct-00 Cyclosporine Oct-00 Cyclophosphamide Oct-00 Actarit Oct-00 Leflunomide Oct-03 Tacrolimus Oct-05
Started/ongoing biologic	ATC codes L04AB, L04AA24, L04AC03, L04AC07, L01XC02	As entered by the treating physician.	Patient reported by interview with nurse at NOAR baseline and all follow-ups.	Physician reported biologic use at index date for cohort used.	Physician reported current use of biologic at index date.	Based on the self-report by patients at each survey. Information has been collected since when: Infliximab Oct-03 Etanercept Oct-05 Tocilizumab Oct-07 Adalimumab Oct-07 Abatacept Oct-10
Started/ongoing corticosteroids	ATC codes H02AA, H02AB, H02BX, H02CA	As entered by the treating physician.	Patient reported by interview with nurse at NOAR baseline and all follow-ups.	Physician reported prednisone use at index date	Physician reported current use of prednisone/prednisolone at index date	Based on the self-report by patients at each survey, which has been collected since Oct-00.
Started/ongoing NSAID/COX-2	ATC codes M01AA, M01AB, M01AC, M01AE, M01AG, M01AH, M01AX, N02BA, M01BA, M01BX	As entered by the treating physician.	NA (For these particular drugs, no start and stop dates are captured)	patient reported NSAID/Cox-2 use at index date. NSAIDs – includes ibuprofen, naproxen, ‘other NSAID’ on all forms; Lodine/Ralafen/Mobic; voltaren captured version 9 onward (after 10/2010) . COX-2 - includes Celebrex (all versions), Bextra, and Vioxx (Bextra and Vioxx were collected only in the early versions of the forms – versions 4 & 5 10/2001-1/2006)	Physician reported current use of non-selective NSAIDS at index date.	Based on the self-report by patients at each survey. Information has been collected since when: Ibuprofen Oct-00 Indometacin Oct-00 Diclofenec sodium Oct-00 Naproxen Oct-00 Sulindac Oct-00 Oxaprozin Oct-00 Ketoprofen Oct-00 Loxoprofen sodium Oct-00 Alminoprofen Oct-00 Pranoprofen Oct-00 Nabumetone Oct-00 Acemetacin Oct-00 Zaltoprofen Oct-00 Proglumetacin maleate Oct-00 Indometacin farnesil Oct-00…
Started/ongoing aspirin	ATC code N02BA	NA	NA (For this particular drug, no start and stop dates are captured.)	Patient reporeted aspirin use at index date	Physician reported current use of aspirin/acetylsalicylic acid at index date	Total aspirin - Based on variables Aspirin and Lowdose Aspirin for patients included from Oct-03 survey, and on variable Aspirin only for subjects included before that
Rheumatoid arthritis disease characteristics at baseline
						Based on both self-report by patients and description by physicians or laboratory data before or on the index date.
Disease duration (years)	From clinical database	Calculated from disease onset as entered by treating physician at first registration	Calculated from onset date as reported by patient.	Physician reported year of onset of RA at time of enrollment. Duration computed from year of onset to index date.	same as CORRONA	RA onset date before enrollment in the cohort was collected based on separate self-report questionnare sheet at first enrollment in the IORRA in each patient.
DAS 28	From clinical database	As entered by the treating physician, most common reason for missing = missing ESR/CRP	Based on swollen and tender counts assessed by research nurse and CPR measured by ARUK Manchester by lab technicians and then calculated by research team.	Computed based on elements of DAS collected on Patient and Physician forms. computed as DAS28(ESR) if ESR available - reported by Physician on enrollment or follow up if available and within 21 days of visit. ESR not a required measure.	Same as CORRONA: DAS(ESR)	Based on both self-report by patients and description by physicians at each survey.
HAQ score	From clinical database	Patients fill out a HAQ-form.	Patient reported.	mHAQ captured on all versions; HAQ captured in version 4 (before 3/2004) and versions 9-10 (10/2010-12/2011]. cHAQ calculated based on mHAQ questions.	HAQ on patientform at each visit	Based on self-report by patients at each survey.
RF+	From clinical database	From RA diagnosis. Baseline data as entered by the treating rheumatologist from info in the medial file.	Determined by ARUK Manchester lab technicians.	If ever reported as RF+. RF positive indicator in version 4 enrollment (and highest titer); RF value reported if available at enrollment (any past value) and follow up; RF+ based on indicator (ver 4) and any reported RF value (RF>19 for RF+). RF value not required and not reported on every patient. a cumulative indicator (over time) is used.	MD reported RF+ at enrollment (yes/no/unknown); RF lab value reported at each visit if Physician ordered lab.	Based on laboratory at each survey.
CRP (mg/l)	From clinical database	As entered by the treating rheumatologist. Nb that CRP lower cut-off for CRP has changed aover time (<10, <5, and <4 et cetera).	Determined by ARUK Manchester lab technicians.	MD reported lab value if available- not required	Lab value reported if available (Physician ordered)	Based on laboratory at each survey.
ESR (mm/h)	From clinical database	As entered by the treating rheumatologist	NA	MD reported lab value if available - not required.	Lab value reported if available (physician ordered)	Based on laboratory at each survey.

## Sheet: Suppl. Table 2
Supplementary Table 2. Outcome definitions
	Definitions
Outcome	Fostamatinib	SRR	NOAR	CORRONA	CORRONA International	IORRA
Hospitalised infection	Phase III: All SAEs reported with MedDRA terms under the "Infections and Infestations" SOC which were hospitalized for this cause. Phase II: All SAEs reported with MedDRA terms under the "Infections and Infestations" SOC	All hospitalizations with ICD10 codes A00-B99, D73.3, E06.0, E32.1, G00-G02, G04.2, G05-G07, H00.0, H44.0, H60.0-H60.3, H66-H67, H70, I30.1, I40.0, J00-J22, J32, J34.0, J36, J38.3, J39.0-J39.1, J44.0, J85, J86, K04.4, K04.6, K04.7, K10.2, K11.3, K12.2, K14.0, K57.0, K57.2, K57.4, K57.8, K61, K63.0, K65.0, K65.1, K65.2, K65.9, L00-L08, L30.3, M00-M01, M46.2-M46.5, M60.0, M65.0, M71.0, M71.1, M72.6…	All hospitalizations with ICD10 codes A00-B99, D73.3, E06.0, E32.1, G00-G02, G04.2, G05-G07, H00.0, H44.0, H60.0-H60.3, H66-H67, H70, I30.1, I40.0, J00-J22, J32, J34.0, J36, J38.3, J39.0-J39.1, J44.0, J85, J86, K04.4, K04.6, K04.7, K10.2, K11.3, K12.2, K14.0, K57.0, K57.2, K57.4, K57.8, K61, K63.0, K65.0, K65.1, K65.2, K65.9, L00-L08, L30.3, M00-M01, M46.2-M46.5, M60.0, M65.0, M71.0, M71.1, M72.6…	Includes all cases of hospitalized infection reported on Physician Form (starting in version 7, as of 6/1/2008) or a TAE form or fatal infection reported on Exit Form, and excludes cases that were refuted on an associated TAE form or adjudicated to be non-cases based on review of source documents. For events when a TAE form or source documents were not available, physician-reported events are def…	Same procedure of use of MD form, TAE form and adjudication as CORRONA US. study period (9/2011- 3/2013)	Source of information: Regular IORRA survey; Mailed survey. Algorithms: - In a regular IORRA survey, patients report the hospitalization and its cause. - The mailed survey has been conducted by the same questionnaire form as used in a regular survery. - Patients who checked the hospitalization and replied infections as a cause were picked up. - No validations were conducted by medical records. - …
Tuberculosis	Phase III: All SAEs in "Tuberculosis" in the "SUBCAT" column from the "Fostamatinib AE of Special Interest MedDRA 15.1.xls" spreadsheet which which were hospitalized for this cause. Phase II: All SAEs in "Tuberculosis" in the "SUBCAT" column from the "Fostamatinib AE of Special Interest MedDRA 15.1.xls" spreadsheet . (See separate Word file of selected preferred terms)	Infections registered to the National Tb Register. In accordance with the Communicable Disease Act, all confirmed TB infections are recorded by the Swedish Institute for Communicable Disease Control. End of follow-up: 31 Dec 2010.	All patient reported cases and hospitalisations with ICD10 codes A15-A19. The end date for consideration was 30 Jun 2011. Although hospitalisation records are available since start of 2000, self-reported events are used as supplementary data when hospitalisation information is unavailable for the reported event.	TB rates based on reported pathogen from MD Follow up Form (section E infections); TB is a specifically coded pathogen. Analysis will use all reported TB cases across all versions. Labeled as TB in versions 4-7 (10/2001-10/2010); labeled as TB (not latent) in versions 9&10 (10/2010-present); final analysis from 10/2001-12/2011	TB rates based on reported pathogen from MD follow up - any infection with TB specifically coded pathogen (Active Tuberculosis). study period (9/2011- 3/2013)	Source of information: Regular IORRA survey; Mailed survey. Algorithms: - In a regular IORRA survey, patients report the occurence of "pulmonary tb" or "non-pulmonary tb". - The mailed survey has been conducted by the same questionnaire form as used in a regular survery. - Patients who answered 'yes' to these questions were picked up. - No validations were conducted by medical records. - There is…
Hospitalized Herpes Zoster	Phase III: All events in "Herpes Zoster virus disease" in the "SUBCAT" column from the "Fostamatinib AE of Special Interest MedDRA 15.1.xls" spreadsheet which which were hospitalized for this cause. Phase II: All SAEs in "Herpes Zoster virus disease" in the "SUBCAT" column from the "Fostamatinib AE of Special Interest MedDRA 15.1.xls" spreadsheet. (See separate Word file of selected preferred ter…	All hospitalizations with ICD10 codes B02 as primary diagnosis. End of follow-up: 31 Dec 2010.	All hospitalizations with ICD10 codes B02. The end date for consideration was 30 Jun 2011.	Subset of HZ cases that are reported as hospitalized on MD FU form. All hospitalized infections with reported pathogen of HZ reported on -- version 7 onward 6/2008-12/2011 will be used excluding cases that were refuted on an associated TAE form or adjudicated to be non-cases based on review of source documents.	Same as CORRONA US - hospitalized cases as indicated with pathogen code of Herpes Zoster.study period (9/2011- 3/2013)	NA
All Herpes Zoster	All adverse events in "Herpes Zoster virus disease" in the "SUBCAT" column from the "Fostamatinib AE of Special Interest MedDRA 15.1.xls" spreadsheet. (See separate Word file of selected preferred terms)	NA	NA	Herpes Zoster rates based on reported pathogen from MD Follow up Form (section E infections); HZ is a specifically coded pathogen. Consistent across all versions. All MD reported HZ cases will be used. Final Analysis period covers 10/2001 - 12/2011	Same as CORRONA US except study period (9/2011- 3/2013)	Source of information: Regular IORRA survey; Mailed survey. Algorithms: - In a regular IORRA survey, patients report the occurence of "Herpes zoster (shingles)". - The mailed survey has been conducted by the same questionnaire form as used in a regular survery. - Patients who answered 'yes' to this question were picked up. - No validations were conducted by medical records. - There is a possibili…

## Sheet: Suppl. Table 3
Supplementary Table 3. Definition of main cohort, sub-cohorts and sensitivity analyses.
Analysis	Short description of registry cohort definition and analysis	Registries with data for analysis	Registry follow-up	Closest corresponding Fostamatinib cohort*
Main analysis	Main registry cohort of patients in registry from 1 January 2000 (or earliest first date after 1 January 2000); baseline at 1 January 2000 or cohort entry	All 5	Main (from 2000)	Overall
Sensitivity analyses
Subcohorts defined based on inclusion criteria
Sensitivity Analysis 1: active RA	Subcohort defined by selection of patients with active RA (patients with seropositive/erosive RA and with ≥4+4 tender/swollen joints); with redefinition of cohort baseline	All 5	From active RA identified	Overall
Sensitivity Analysis 2: treatment switch/addition in biologics naïve patients (MTX/DMARD-IR)	Subcohort defined by selection of patients with treatment switch/addition who are previously biologics-naïve (inadequate response to MTX/DMARDs); with redefinition of cohort baseline	All 5	From DMARD switch/change	MTX-IR
Sensitivity Analysis 3: treatment switch/addition in patients previously treated with biologics (BLX-IR)	Subcohort defined by selection of patients with treatment switch/addition who have been previously treated with biologics (inadequate response to biologics); with redefinition of cohort baseline	CORRONA, SRR	From DMARD switch/change	BLX-IR
Subcohorts with additional restriction based on trial exclusion criteria
Sensitivity Analysis 4: MTX/DMARD-IR patients with RA trial programme exclusion criteria also applied	Subcohort defined by restriction by applying the 3 selected relevant RA trial programme exclusion criteria to the patients in MTX/DMARD-IR analysis: Major CV event in the previous 6 months, prednisone dose >10 mg/d, and history of cancer.	All 5	From DMARD switch/change	MTX-IR
Sensitivity Analysis 5: BLX-IR patients with RA trial programme exclusion criteria also applied	Subcohort defined by restriction by applying the 3 selected relevant RA trial programme exclusion criteria to the patients in BLX-IR analysis: Major CV event in the previous 6 months, prednisone dose >10 mg/d, and history of cancer.	CORRONA, SRR	From DMARD switch/change	BLX-IR
Restrictions in calendar time period studied, and in follow-up (truncated to 18 months)
Sensitivity Analysis 6: cohorts from 2005	Subcohort defined by selection of cohort followed from 1 January 2005 onwards, ie, main cohort defined from 1 January 2005, excludes patients only present before 1 January 2005; with redefinition of cohort baseline	All 5	From 2005	Overall
Sensitivity Analysis 7: MTX/DMARD-IR patients with 18 months truncated follow-up	Subcohort of same population as MTX/DMARD-IR analysis but with 18 months follow-up	All 5	From DMARD switch/change, for max. 18 months	MTX-IR
Sensitivity Analysis 8: BLX-IR patients with 18 months truncated follow-up	Subcohort of same population as BLX-IR analysis but with 18 months follow-up	CORRONA, SRR	From DMARD switch/change, for max. 18 months	BLX-IR
Additional standardisation
Sensitivity Analysis 9: standardized for HAQ score in addition to sex and age	Main registry cohort of patients in registry from 1 January 2000 (or earliest first date after 1 January 2000); baseline at 1 January 2000 or cohort entry; additional standardization for HAQ score, in addition to age and sex	All 5	Main (from 2000)	Overall
* Clarifies which of the 3 fostamatinib trial pools (Overall, MTX-IR or BLX-IR) is most comparable in terms of study population to each main or sensitivity analysis cohort

## Sheet: Suppl. Table 4
Supplementary Table 4. Baseline characteristics of RA patients in the sub-cohorts representing treatment switch/addition in
biologics-naïve patients (MTX/DMARD-IR), used in Sensitivity Analyses 2 and 7, from 5 RA registries and one RA clinical trial Program
Variable		Fostamatinib trials	CORRONA	SRR	NOAR	CORRONA International	IORRA
		(n=2636)	(n=3079)	(n=5945)	(n=364)	(n=285)	(n=5250)
Demographic and RA disease characteristics, N (%)*
Sex	Male	432 (16.4)	758 (24.6)	1640 (27.6)	106 (29.1)	43 (15.1)	867 (16.5)
	Female	2204 (83.6)	2321 (75.4)	4305 (72.4)	258 (70.9)	242 (84.9)	4383 (83.5)
Age, years	<50	956 (36.3)	707 (23.0)	1631 (27.4)	110 (30.2)	133 (46.7)	1328 (25.3)
	50-<60	918 (34.8)	828 (26.9)	1436 (24.2)	97 (26.6)	89 (31.2)	1475 (28.1)
	60-<70	579 (22.0)	834 (27.1)	1630 (27.4)	89 (24.5)	44 (15.4)	1556 (29.6)
	>=70	183 (6.9)	710 (23.1)	1248 (21.0)	68 (18.7)	19 (6.7)	891 (17.0)
Race**	White	1829 (79.0)	2710 (88.5)	NA	363 (99.7)	114 (40.3)	0 (0.0)
	Asian	69 (3.0)	50 (1.6)	NA	0 (0.0)	90 (31.8)	5250 (100.0)
	Black	85 (3.7)	245 (8.0)	NA	0 (0.0)	1 (0.4)	0 (0.0)
	Other	332 (14.3)	57 (1.9)	NA	1 (0.3)	78 (27.6)	0 (0.0)
Disease duration (years)	<5	1018 (50.0)	1402 (45.6)	3935 (66.4)	219 (60.2)	107 (37.5)	1776 (33.8)
	5-<10	465 (22.8)	605 (19.7)	871 (14.7)	75 (20.6)	92 (32.3)	1231 (23.4)
	>=10	554 (27.2)	1067 (34.7)	1117 (18.9)	70 (19.2)	86 (30.2)	2243 (42.7)
DAS28	<3.2	2 (0.1)	558 (41.5)	1535 (29.9)	7 (17.5)	42 (18.0)	1221 (24.1)
	3.2-<5.1	687 (26.2)	530 (39.4)	2239 (43.6)	23 (57.5)	123 (52.8)	2815 (55.6)
	>=5.1	1936 (73.8)	258 (19.2)	1360 (26.5)	10 (25.0)	68 (29.2)	1026 (20.3)
HAQ score	<1.1	579 (22.0)	1813 (61.5)	3559 (66.6)	45 (30.0)	116 (52.0)	3377 (64.5)
	1.1-<1.8	1113 (42.3)	868 (29.4)	1329 (24.9)	48 (32.0)	67 (30.0)	1212 (23.1)
	>=1.8	938 (35.7)	268 (9.1)	458 (8.6)	57 (38.0)	40 (17.9)	650 (12.4)
RF+	Yes	1696 (77.3)	2112 (85.7)	5945 (100.0)	141 (96.6)	195 (85.5)	5014 (96.7)
CRP (mg/l)	<6	979 (37.1)	406 (54.3)	1864 (34.0)	5 (11.6)	37 (42.5)	2032 (39.1)
	6-<10	453 (17.2)	129 (17.2)	993 (18.1)	9 (20.9)	15 (17.2)	721 (13.9)
	10-<16	385 (14.6)	71 (9.5)	934 (17.0)	5 (11.6)	11 (12.6)	677 (13.0)
	>=16	819 (31.1)	142 (19.0)	1695 (30.%)	24 (55.8)	24 (27.6)	1764 (34.0)
ESR (mm/h)	<28	275 (10.9)	980 (69.1)	3652 (66.4)	NA	98 (41.9)	1776 (34.4)
	28-<42	1166 (46.2)	219 (15.4)	834 (15.2)	NA	48 (20.5)	1060 (20.5)
	>=42		220 (15.5)	1017 (18.5)	NA	88 (37.6)	2331 (45.1)
Comorbidities (medical history), N (%)*
Diabetes		216 (10.6)	211 (6.9)	261 (4.4)	36 (9.9)	36 (12.6)	181 (3.4)
Coronary artery disease		21 (1.0)	188 (6.1)	413 (6.9)	12 (3.3)	18 (6.3)	145 (2.8)
Hypertension		818 (40.2)	890 (28.9)	511 (8.6)	89 (24.5)	94 (33.0)	691 (13.2)
Peptic/bleeding ulcer		NA	229 (7.4)	138 (2.3)	26 (7.1)	10 (3.5)	279 (5.3)
Liver disease		NA	193 (6.3)	42 (0.7)	4 (1.1)	3 (1.1%	164 (3.1)
Assigned treatment (treatments used from baseline), N (%)*
Methotrexate		2314 (87.8)	2160 (70.2)	3613 (60.8)	251 (69.0)	239 (83.9)	4530 (86.3)
Other non-biologic DMARD		315 (11.9)	1584 (51.4)	2686 (45.2)	278 (76.4)	235 (82.5)	4697 (89.5)
Biologics		1 (0.0)	1685 (54.7)	1528 (25.7)	0 (0.0)	10 (3.5)	938 (17.9)
Corticosteroids		1425 (54.1)	943 (30.6)	2450 (41.2)	89 (24.5)	65 (22.8)	3511 (66.9)
NSAID/COX-2		1824 (69.2)	1503 (48.8)	2412 (40.6)	NA	197 (69.1)	4554 (86.7)
* Percentages were calculated based on non-missing data ** Each patient is listed in only 1 category; patients who reported mixed race are coded in the first relevant category of the 4 listed. CORRONA: Consortium of Rheumatology Researchers of North America; COX-2: Cyclooxygenase-2 inhibitors; CRP: C-reactive protein; DAS28: Disease activity score in 28 joints (DAS28 in the NOAR registry is calcu…
